# Supplementary material for: Mechanochemical destruction of per- and polyfluoroalkyl substances in aqueous film-forming foams and contaminated soil
Source: Royal Society of Chemistry journal article supplement (doi:10.1039/d3va00099k), 2023-01-01
Supplement: d3va00099k1.pdf [file d3va00099k1.pdf]

## Electronic Supplementary Information

# Mechanochemical Destruction of Per- and Polyfluoroalkyl Substances in Aqueous Film-Forming Foams and Contaminated Soil

*Kapish Gobindlal<sup>\*,1,2,3</sup>, Erin Shields<sup>4</sup>, Andrew Whitehill<sup>4</sup>, Cameron C. Weber<sup>1,2,5</sup>, Jonathan Sperry<sup>\*,1,2</sup>*

<sup>1</sup>Centre for Green Chemical Science, University of Auckland, Auckland, New Zealand.

<sup>2</sup>School of Chemical Sciences, University of Auckland, Auckland, New Zealand.

<sup>3</sup>Environmental Decontamination (NZ) Limited, Auckland, New Zealand.

<sup>4</sup>Office of Research and Development, U.S. Environmental Protection Agency, Research Triangle Park, North Carolina, USA.

<sup>5</sup>The MacDiarmid Institute for Advanced Materials and Nanotechnology, Wellington, New Zealand.

### Corresponding Authors

Jonathan Sperry - [j.sperry@auckland.ac.nz](mailto:j.sperry@auckland.ac.nz)

Kapish Gobindlal – [kapish@edl-asia.com](mailto:kapish@edl-asia.com)

Supporting Information Summary: 16 Pages, 7 Figures, 6 Tables.

## Table of Contents

|                                                                           |    |
|---------------------------------------------------------------------------|----|
| 1. Mechanochemical Milling Programs.....                                  | 3  |
| 2. Analytical Procedures for Targeted (LC-MS/MS) .....                    | 5  |
| 3. Extractable Organic Fluorine Analysis.....                             | 6  |
| 4. LC-MS/MS Target PFAS Analyte List .....                                | 7  |
| 5. Tridol S3 AFFF Concentrate General Properties .....                    | 9  |
| 6. AFFF Concentrate Component PFASs.....                                  | 10 |
| 7. LC-MS/MS and EOF Degradation Results: Tridol S3 AFFF Concentrate ..... | 11 |
| 8. Characterization of AFFF-Impacted Soil .....                           | 13 |
| 9. LC-MS/MS Degradation Results: AFFF-Impacted Soil .....                 | 15 |
| References.....                                                           | 17 |

## 1. Mechanochemical Milling Programs

**AFFF Concentrate.** For each milling run, 2.5 mL of Tridol S3 was accurately pipetted onto 25 g of quartz sand, which was also accurately weighed. The ratio of quartz sand to AFFF concentrate was approximately 10:1 w/w. The mixture was placed into a stainless-steel cylindrical milling vessel that had an internal volume of 500 cm<sup>3</sup>. Twenty stainless steel balls (15 mm diameter, 13.5 g each) were also placed into the vessel with the AFFF-spiked quartz sand and sealed with a stainless-steel lid. A Retsch PM100 planetary ball mill (Germany) was used for all mechanochemical experiments. The ball mill rotational speed was set to 425 rpm and operated for various time intervals from 15 minutes up to 1440 minutes. A custom milling program was set to switch the direction of the vessel rotation every 15 minutes for the specified time of the trial run to avoid caking on the internal walls of the milling vessel. Interval sampling of the matrix would lead to diminishing the mass held within the stainless-steel vessel, thus altering the internal conditions. Therefore, each data point was generated from a discrete trial run. All experimental runs were conducted under ambient temperature, pressure, and humidity. The initial sample was taken at 15 mins as this timeframe allowed for the homogenization of the Tridol S3 AFFF concentrate and the quartz sand matrix. Reduced MCD conditions (relative to full-scale MCD reactor systems) were selected to follow the degradation of PFASs in Tridol S3 rather than to achieve rapid destruction of the target compounds, thus providing important information related to the mechanism of degradation. As a point of interest, full-scale mechanochemical systems which have the capability to treat persistent organic pollutants and PFASs are typically continuous flow stirred horizontal ball mills.<sup>1-3</sup> These systems create intense ball-to-ball and ball-to-surface collision points, similar to a planetary ball mill, but with significantly more impacts per second due to the larger vessel size (several hundred-liter capacity).

**AFFF-Impacted Soil.** Approximately 1 kg of the as-received soil was sieved to exclude any particles larger than 2 mm (e.g., rocks, twigs, roots) and subsequently dried at 80°C for 6 hours. No other preprocessing was carried out. For each milling run, 25 g of the dried soil was accurately weighed and placed into a stainless-steel cylindrical milling vessel that had an internal volume of 500 cm<sup>3</sup>. 20 stainless steel balls (15 mm diameter, 13.5 g each) were also placed into the vessel with the AFFF impacted soil and sealed with a stainless-steel lid. A Retsch PM100 planetary ball mill (Germany) was used for all mechanochemical experiments. The ball mill rotational speed was set to 425 rpm and operated for various time intervals up to 1440 minutes. A custom milling program was set to switch the direction of the vessel rotation every 15 minutes for the specified time of the trial run to avoid caking on the internal walls of the milling vessel. Interval sampling of the matrix would lead to diminishing the mass held within the stainless-steel vessel, thus altering the internal conditions. Therefore, each data point was generated from a discrete trial run. All experimental runs were conducted under ambient temperature, pressure, and humidity. These reduced MCD conditions were selected to follow the degradation of PFAS in contaminated soil sample rather than to achieve rapid destruction of the target compounds, thus providing important information related to the mechanism of degradation.

## 2. Analytical Procedures for Targeted (LC-MS/MS)

**LC-MS/MS.** The extract was analyzed using a Sciex Triple Quad 6500+ LC-MS/MS system running in negative ion mode and using electron spray ionization (ESI). 10  $\mu$ L of the diluted sample extract was injected into the LC fitted with a Waters C18 analytical column (100 mm x 2.1 mm, 2.5  $\mu$ m fully porous) and a Phenomenex C18 delay column (50 mm x 2.0 mm, 3  $\mu$ m) to protect against PFAS originating from within the LC system. The approximate flowrate was 0.5 mL/min to the MS/MS. In line with standard analytical practice, detection was conducted using multiple reaction monitoring mode with two transitions monitored per compound, one as a quantifier and one as a qualifier. A series of eight solvent-based calibration standards were run twice during each analysis batch, prepared at 10, 20, 50, 100, 200, 500, 1000, 2000 ng/L, which also included isotopically labelled internal standards at a fixed concentration. Samples containing an equivalent amount of internal standard were quantified against these. Confirmation of identity was based on retention time and ion ratio matching. Surrogate compounds were added to all samples and blanks to observe the extraction efficiency of the process. Table S1 provides a list of all PFAS analytes that were quantitatively assessed.

### 3. Extractable Organic Fluorine Analysis

Total organic fluorine (TOF) analysis is a non-selective detection method that utilizes combustion ion chromatography (CIC) and cannot differentiate between organic fluorine and inorganic fluoride.<sup>4</sup> Here, extractable organic fluorine (EOF) analysis was carried out by Eurofins Environmental Testing Australia on both subsets of samples (AFFF-quartz sand; contaminated soil) before and after MCD treatment. The selectivity of the EOF method is directly related to sample preparation and the type of solvent used for extraction. The purpose of EOF analysis was to broadly evaluate the overall presence of both target and non-target PFASs in the untreated and treated solid matrices. In this method, an aqueous methanol solvent was used to extract PFASs from the solid sample material (~0.5 g) and then concentrated to at least 1 mL prior to analysis by CIC. In this work, the EOF results were derived by comparing the concentration in the initial samples versus the concentration in the final samples.

#### 4. LC-MS/MS Target PFAS Analyte List

**Table S1.** LC-MS/MS PFAS analyte list and definitions.

| PFAS Class                      | Abbreviation          | Full Name                                                         |
|---------------------------------|-----------------------|-------------------------------------------------------------------|
| Perfluorinated Sulfonic Acids   | PFPrS (linear)        | Perfluoro-1-propanesulfonic acid                                  |
|                                 | PFBS (linear)         | Perfluoro-1-butanesulfonic acid                                   |
|                                 | PFPeS (linear)        | Perfluoro-1-pentanesulfonic acid                                  |
|                                 | PFHxS (linear)        | Perfluoro-1-hexanesulfonic acid                                   |
|                                 | PFHxS (mono branched) | Trifluoromethylperfluoropentanesulfonic acid                      |
|                                 | PFHxS (di branched)   | Di(trifluoromethyl)perfluorobutanesulfonic acid                   |
|                                 | PFHxS (Total)         | Sum of PFHxS (linear), PFHxS (mono and di branched)               |
|                                 | PFHpS (linear)        | Perfluoro-1-heptanesulfonic acid                                  |
|                                 | PFOS (linear)         | Perfluoro-1-octanesulfonic acid                                   |
|                                 | PFOS (mono branched)  | Trifluoromethylperfluoroheptanesulfonic acid                      |
|                                 | PFOS (di branched)    | Di(trifluoromethyl)perfluorohexanesulfonic acid                   |
|                                 | PFOS (Total)          | Sum of PFOS (linear), PFOS (mono branched) and PFOS (di branched) |
|                                 | PFNS (linear)         | Perfluoro-1-nonanesulfonic acid                                   |
|                                 | PFDS (linear)         | Perfluoro-1-decanesulfonic acid                                   |
| Perfluoroalkyl Carboxylic Acids | PFBA                  | Perfluoro-n-butanoic acid                                         |
|                                 | PFPeA                 | Perfluoro-n-pentanoic acid                                        |
|                                 | PFHxA                 | Perfluoro-n-hexanoic acid                                         |
|                                 | PFHpA                 | Perfluoro-n-heptanoic acid                                        |
|                                 | PFOA                  | Perfluoro-n-octanoic acid                                         |
|                                 | PFNA                  | Perfluoro-n-nonanoic acid                                         |
|                                 | PFDA                  | Perfluoro-n-decanoic acid                                         |
|                                 | PFUnDA                | Perfluoro-n-undecanoic acid                                       |
|                                 | PFDoDA                | Perfluoro-n-dodecanoic acid                                       |
|                                 | PFTTrDA               | Perfluoro-n-tridecanoic acid                                      |
|                                 | PFTeDA                | Perfluoro-n-tetradecanoic acid                                    |

|                                        |           |                                                          |
|----------------------------------------|-----------|----------------------------------------------------------|
| Perfluorinated Sulfonamides            | PFOSA     | Perfluoro-1-octanesulfonamide                            |
|                                        | N-EtFOSA  | N-ethylperfluoro-1-octanesulfonamide                     |
|                                        | N-MeFOSA  | N-methylperfluoro-1-octanesulfonamide                    |
| Perfluorinated Sulfonamidoacetic Acids | PFOSAA    | Perfluoro-1-octanesulfonamidoacetic acid                 |
|                                        | N-EtFOSAA | N-ethylperfluoro-1-octanesulfonamidoacetic acid          |
|                                        | N-MeFOSAA | N-methylperfluoro-1-octanesulfonamidoacetic acid         |
| Perfluoroalkyl Sulfonamidoethanols     | N-EtFOSE  | 2-(N-ethylperfluoro-1-octanesulfonamido)-ethanol         |
|                                        | N-MeFOSE  | 2-(N-methylperfluoro-1-octanesulfonamido)-ethanol        |
| Fluorotelomer Sulfonates               | 4:2 FTS   | 1H,1H,2H,2H-perfluoro-1-hexanesulfonic acid              |
|                                        | 6:2 FTS   | 1H,1H,2H,2H-perfluoro-1-octanesulfonic acid              |
|                                        | 8:2 FTS   | 1H,1H,2H,2H-perfluoro-1-decanesulfonic acid              |
| Other                                  | HFPO-DA   | 2,3,3,3-Tetrafluoro-2-(heptafluoropropoxy)propanoic acid |



## 5. Tridol S3 AFFF Concentrate General Properties

**Table S2.** Physical and chemical properties of Tridol S3 AFFF concentrate.

| Physical/Chemical Property | Value                     |
|----------------------------|---------------------------|
| Appearance                 | Clear, pale-yellow liquid |
| Melting Point              | -3°C                      |
| Boiling Point              | 100°C                     |
| Solubility with Water      | Miscible with water       |
| Density                    | 1.02 g/cm <sup>3</sup>    |
| pH                         | 6.5-8                     |
|                            |                           |

**Table S3.** Manufacturer's stated composition of Tridol S3 AFFF concentrate (SDS).

| Component                         | CAS Number | Content |
|-----------------------------------|------------|---------|
| Diethylene glycol monobutyl ether | 112-34-5   | 15%-30% |
| Alkyl dimethylamine oxides        | NA         | 5%-10%  |
| Magnesium sulfate                 | 7489-88-9  | 1%-5%   |
| Fluorosurfactants                 | NA         | 1%-5%   |
| Water                             | 7732-18-5  | 50%-74% |
|                                   |            |         |

## 6. AFFF Concentrate Component PFASs

**Table S4.** Putatively identified PFAS anions in the Tridol S3 AFFF Concentrate. (Suspect ID derived from NIST PFAS suspect list) Note: QToF equipped with ESI and operated in negative ion mode).

| Suspect ID | Compound Type   | Putative Formula                                                               | Experimental m/z | Expected m/z |
|------------|-----------------|--------------------------------------------------------------------------------|------------------|--------------|
| 3052       | FTS             | C <sub>8</sub> H <sub>4</sub> F <sub>13</sub> O <sub>3</sub> S                 | 426.9675         | 426.9674     |
| 3285       | FTSAS           | C <sub>15</sub> H <sub>17</sub> F <sub>13</sub> NO <sub>4</sub> S <sub>2</sub> | 586.0217         | 586.0428     |
| 3407       | FTSAS Sulfoxide | C <sub>15</sub> H <sub>17</sub> F <sub>13</sub> NO <sub>5</sub> S <sub>2</sub> | 602.0304         | 602.0377     |

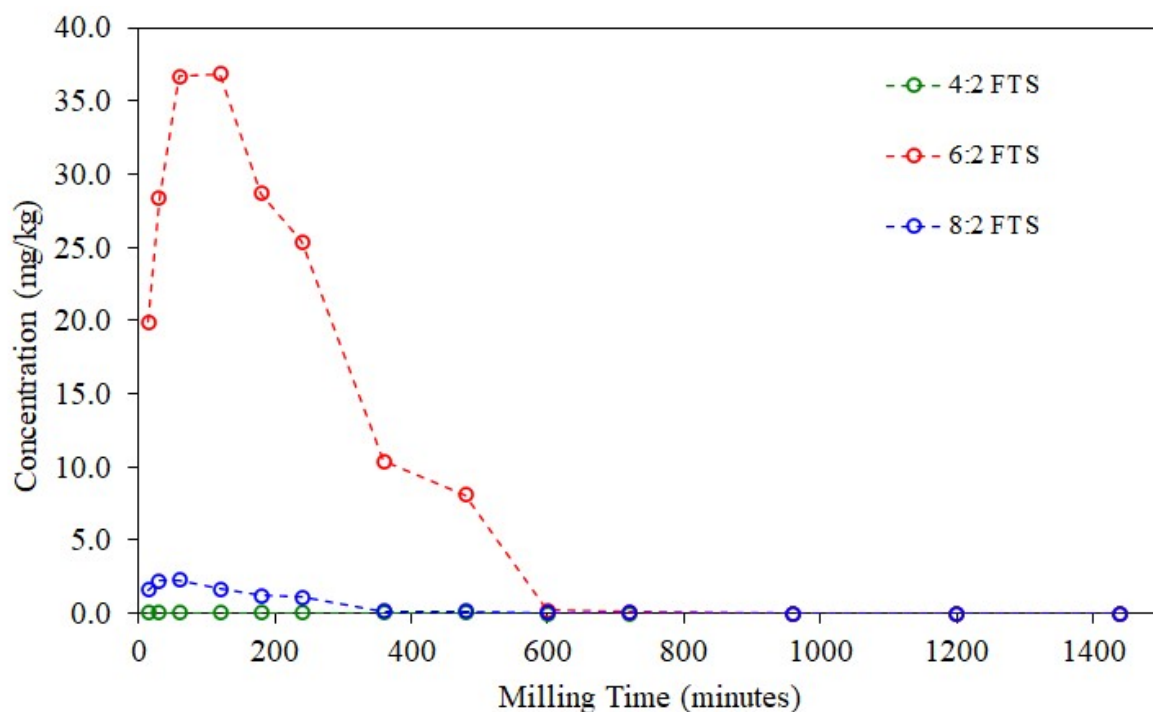

dation Results: Tridol S3 AFFF Concentrate

**Figure S1.** Degradation curves of constituent FTSs in the AFFF-spiked quartz sand.

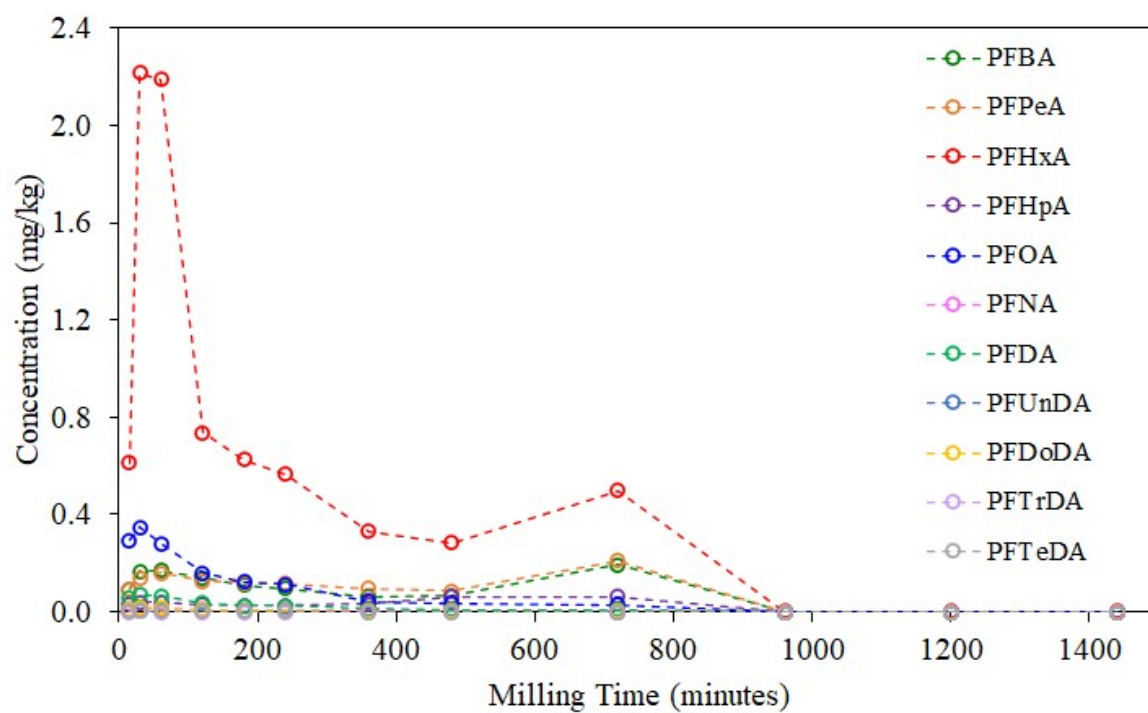

**Figure S2.** Degradation curves of constituent PFCAs in the AFFF-spiked quartz sand.

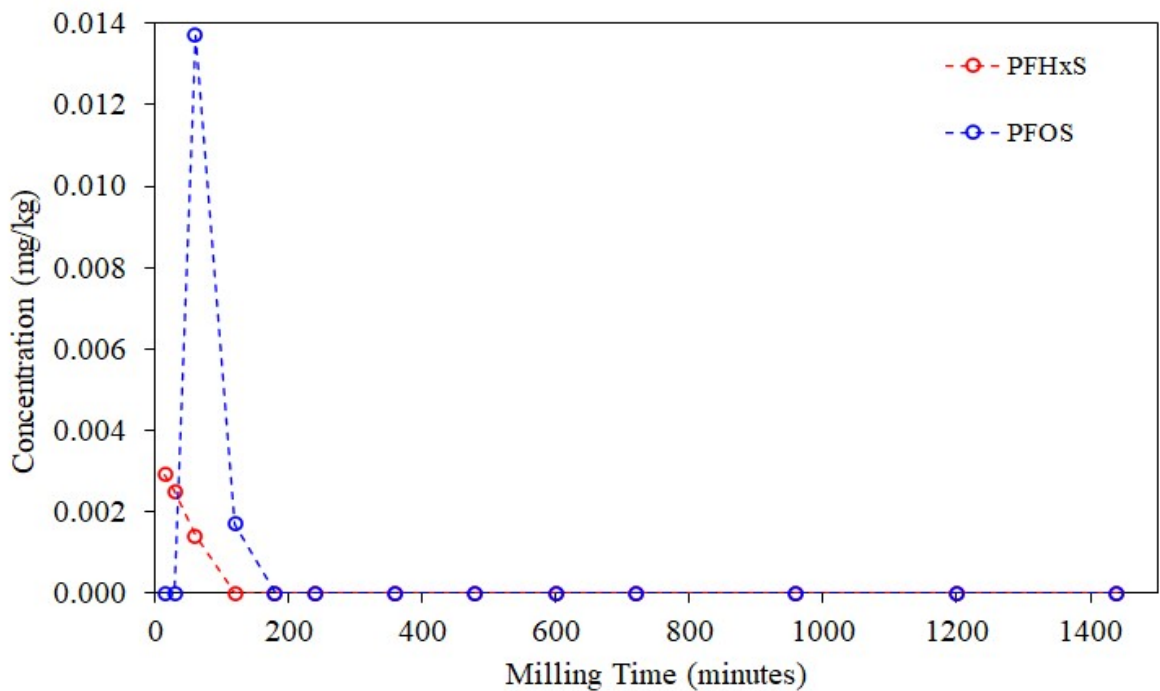

**Fig**  
**ure**  
**S3.**  
De  
gra  
dati  
on  
cur  
ves  
of

constituent PFSA in the AFFF-spiked quartz sand.

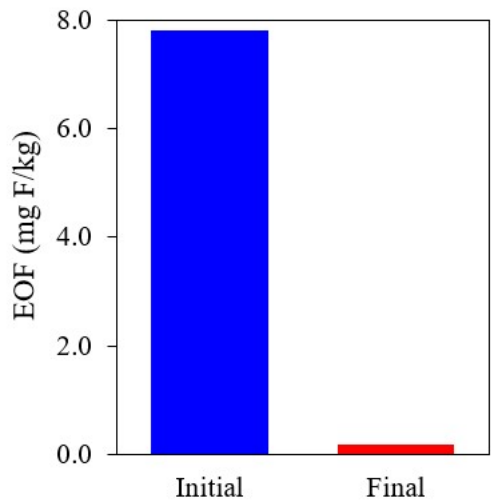

**Figure S4.** Comparison of EOF for the AFFF concentrate spiked onto quartz sand, before and after MCD. The initial sample was collected at 0 minutes milling time and the final sample was collected at 1,440 minutes milling time.

## 8. Characterization of AFFF-Impacted Soil

**Table S5.** Physical and chemical properties of the AFFF-contaminated soil sample.

| Physical/Chemical Property | Value                        |
|----------------------------|------------------------------|
| Soil pH                    | 5.2                          |
| Electrical Conductivity    | 111 $\mu\text{S}/\text{cm}$  |
| Moisture                   | 19%                          |
| Total Organic Carbon       | 2.3 g/100g dry wt            |
| Organic Matter in Soil     | 6.9 g/100g dry wt            |
| Ash in Soil                | 93.1 g/100g dry wt           |
| Specific Surface Area      | 689.5 $\text{m}^2/\text{kg}$ |
|                            |                              |

**Table S6.** PFAS content of AFFF-contaminated soil. Definitions are provided in Table S1.

| PFAS Class                              | PFAS           | Value (mg/kg) |
|-----------------------------------------|----------------|---------------|
| Perfluorinated Sulfonic Acids (PFSAs)   | PFPrS (linear) | 0.0027        |
|                                         | PFBS (linear)  | 0.0027        |
|                                         | PFPeS (linear) | 0.0028        |
|                                         | PFHxS (Total)  | 0.0039        |
|                                         | PFHpS (linear) | 0.0028        |
|                                         | PFOS (Total)   | 0.0620        |
|                                         | PFNS (linear)  | 0.0030        |
|                                         | PFDS (linear)  | 0.0030        |
| Perfluoroalkyl Carboxylic Acids (PFCAs) | PFBA           | 0.0051        |
|                                         | PFPeA          | 0.0162        |
|                                         | PFHxA          | 0.0137        |
|                                         | PFHpA          | 0.0078        |
|                                         | PFOA           | 0.0146        |
|                                         | PFNA           | 0.0231        |
|                                         | PFDA           | 0.0225        |
|                                         | PFUnDA         | 0.0107        |
|                                         | PFDoDA         | 0.0073        |
|                                         | PFTTrDA        | 0.0030        |
|                                         | PFTeDA         | 0.0030        |
| Perfluorinated Sulfonamides (FASAs)     | PFOSA          | 0.0083        |
|                                         | N-EtFOSA       | 0.0030        |
|                                         | N-MeFOSA       | 0.0030        |
| Perfluorinated Sulfonamidoacetic Acids  | PFOSAA         | 0.0030        |
|                                         | N-EtFOSAA      | 0.0030        |
|                                         | N-MeFOSAA      | 0.0030        |
| Perfluoroalkyl Sulfonamidoethanols      | N-EtFOSE       | 0.0030        |

|                                 |          |        |
|---------------------------------|----------|--------|
|                                 | N-MeFOSE | 0.0030 |
| Fluorotelomer Sulfonates (FTSs) | 4:2 FTS  | 0.0030 |
|                                 | 6:2 FTS  | 0.0718 |
|                                 | 8:2 FTS  | 0.2395 |
| Other                           | HFPO-DA  | 0.0030 |

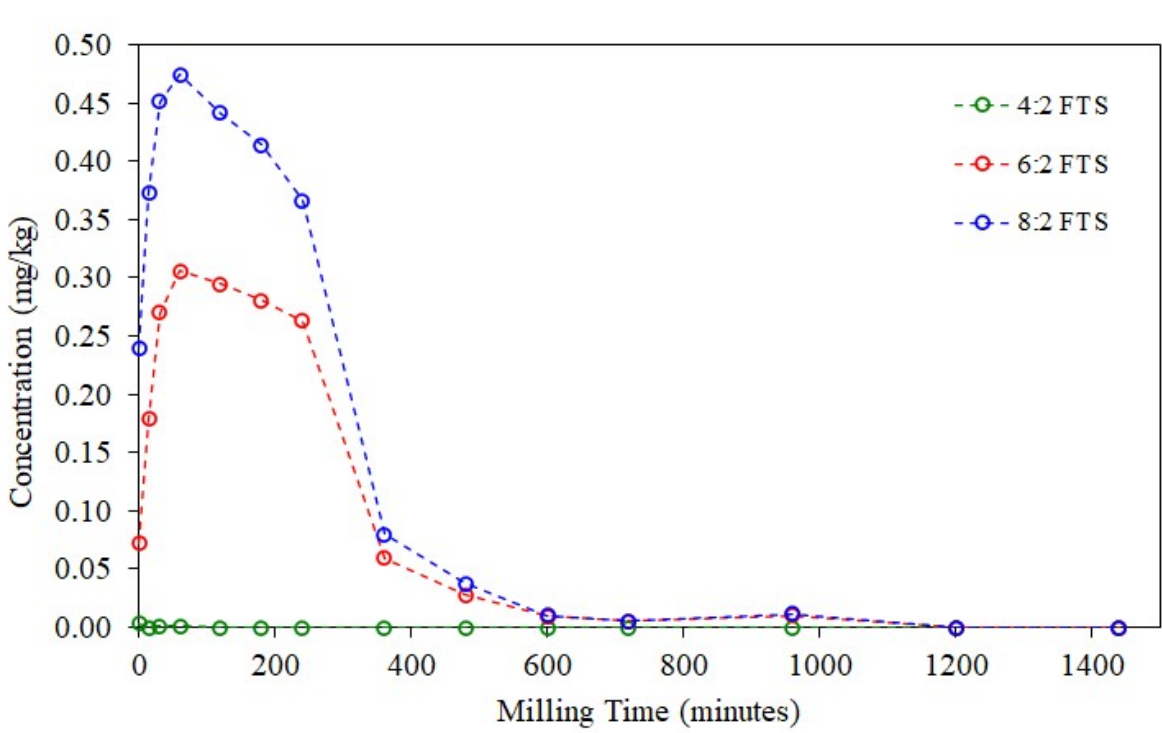

**dation Results: AFFF-Impacted Soil**

9.  
 LC  
 -  
 MS  
 /M  
 S  
 and  
 EO  
 F  
 De  
 gra

**Figure S5.** Degradation curves of constituent FTSs in the AFFF-contaminated soil.

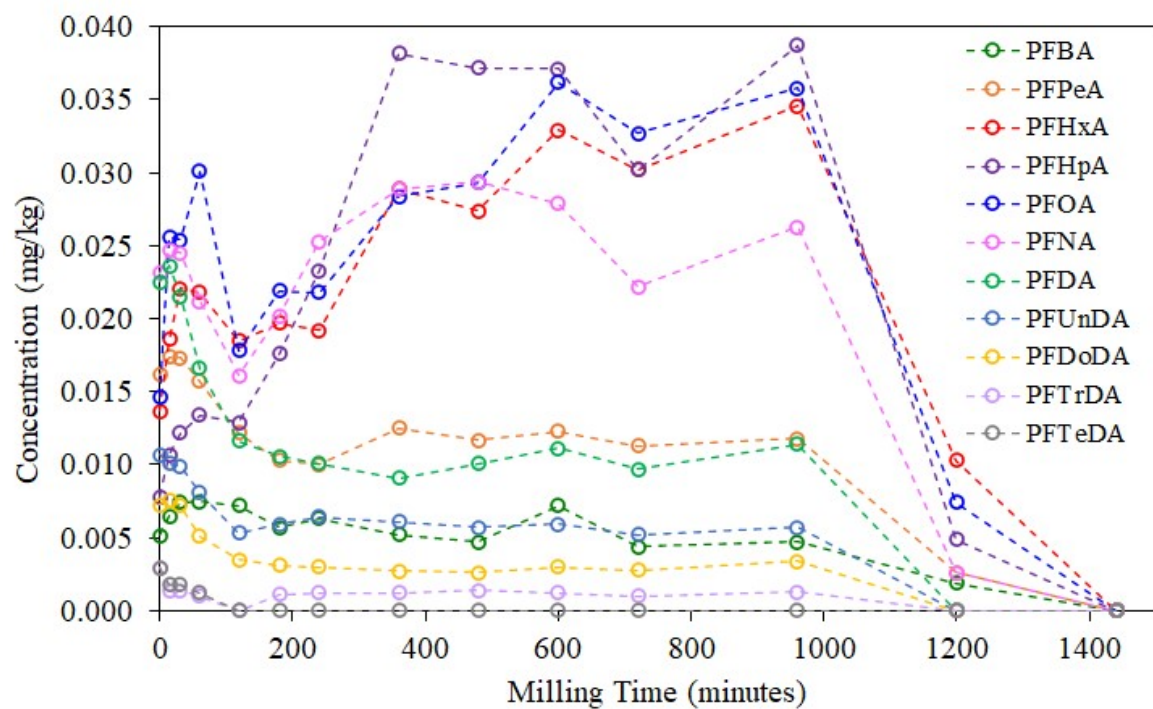

**Figure S6.** Degradation curves of constituent PFCA s in the AFFF-contaminated soil.

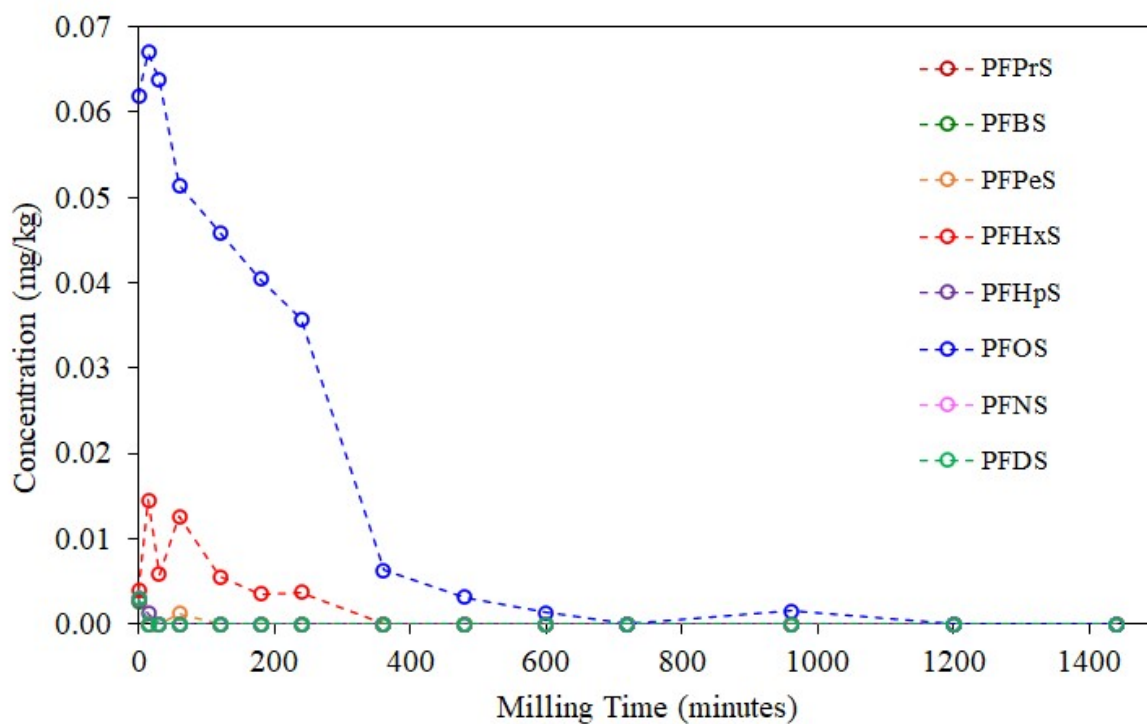



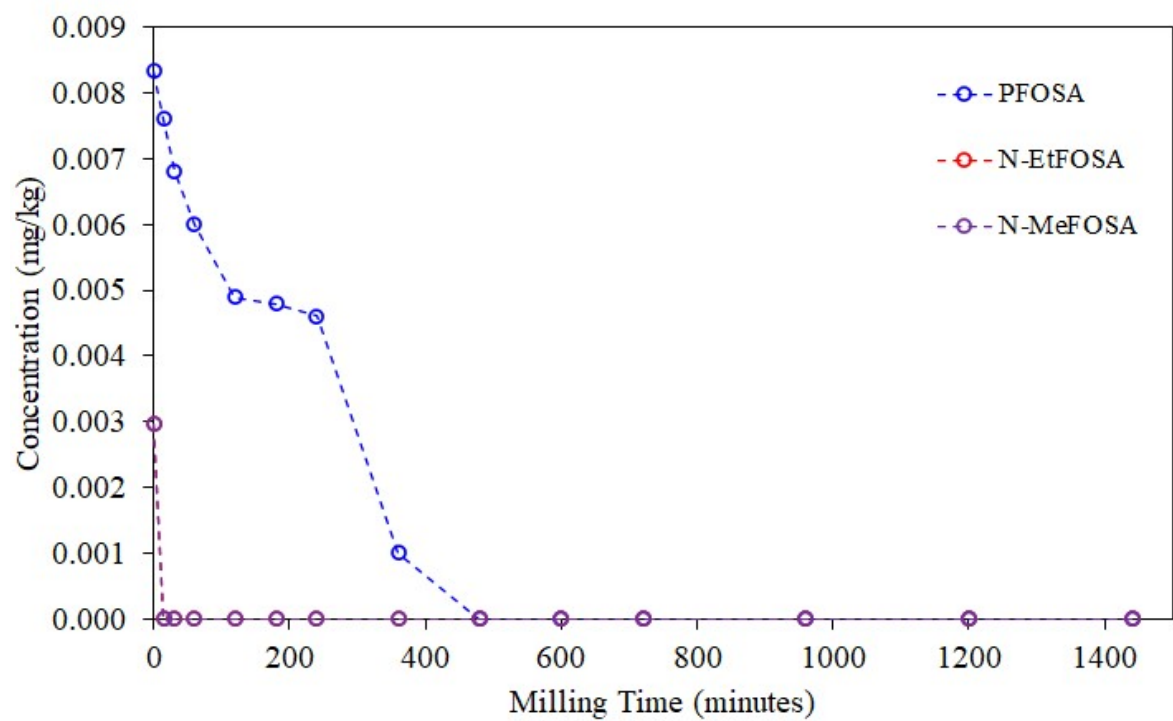

As in the AFFF-contaminated soil.

**Figure S7.** Degradation curves of constituent PFS

**Figure S8.** Degradation curves of constituent FASAs in the AFFF-contaminated soil.

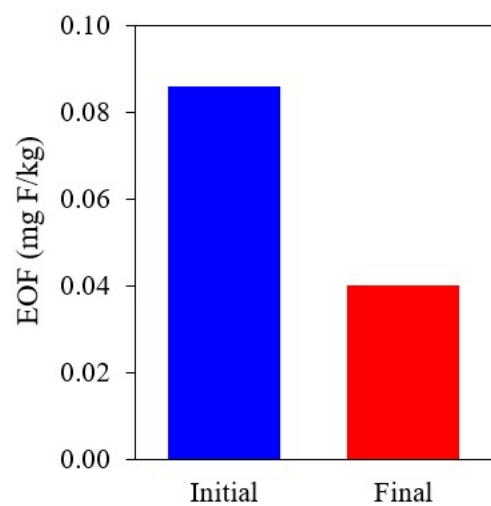

**Figure S9.** Comparison of EOF for the AFFF-impacted soil, before and after MCD. The initial sample was collected at 0 minutes milling time and the final sample was collected at 1,440 minutes milling time.

## References

- 1 R. J. Cooke, *GEF/UNDP Project on Environmental Remediation of Dioxin Contaminated Hotspots in Vietnam: Independent Expert Evaluation of Three Pilot/Laboratory Scale Technology Demonstrations on Dioxin Contaminated Soil Destruction from the Bien Hoa Airbase in Viet Nam*, Alberta, Canada, 2015.
- 2 G. Cagnetta, J. Robertson, J. Huang, K. Zhang and G. Yu, *J. Hazard. Mater.*, 2016, **313**, 85–102.
- 3 U.S. EPA, *Technol. News Trends*, 2007, 1–6.
- 4 C. A. McDonough, J. L. Guelfo and C. P. Higgins, *Curr. Opin. Environ. Sci. Heal.*, 2019, **7**, 13–18.
